# Supplementary material for: Employment Status of People With Mental Illness: National Survey Data From 2009 and 2010
Source: Atypon-hosted journal article supplement (doi:10.1176/appi.ps.201300335), 2014-06-16
Supplement: 1201_ds001.pdf [file 1201_ds001.pdf]

## Appendix 1. Comparison of employment models with varying definitions of mental health status

| <i>Observations</i>            | <i>K6 only</i> |           | <i>NSDUH classification</i> |           |
|--------------------------------|----------------|-----------|-----------------------------|-----------|
|                                | OR             | CI        | OR                          | CI        |
| <i>Mental Illness Severity</i> |                |           |                             |           |
| None                           | ---            | ---       | ---                         | ---       |
| Mild                           | 1.06           | .95-1.19  | 1.00                        | .91-1.10  |
| Moderate                       | .91            | .81-1.01  | 1.00                        | .88-1.12  |
| Serious                        | .94            | .84-1.04  | .92                         | .82-1.03  |
| <i>Age*Mental Illness</i>      |                |           |                             |           |
| Mild*26-34                     | .72            | .59-.88   | .69                         | .56-.85   |
| Mild*35-49                     | .70            | .57-.87   | .73                         | .60-.88   |
| Mild*50-64                     | .72            | .54-.95   | .88                         | .70-1.11  |
| Moderate*26-34                 | .62            | .47-.80   | .81                         | .61-1.09  |
| Moderate*35-49                 | .66            | .54-.81   | .65                         | .50-.84   |
| Moderate*50-64                 | .75            | .55-1.00  | .45                         | .32-.62   |
| Serious*26-34                  | .60            | .47-.77   | .53                         | .41-.68   |
| Serious*35-49                  | .43            | .34-.54   | .48                         | .39-.59   |
| Serious*50-64                  | .38            | .27-.54   | .45                         | .34-.60   |
| <i>Age</i>                     |                |           |                             |           |
| 18-25                          | ---            | ---       | ---                         | ---       |
| 26-34                          | 1.87           | 1.70-2.05 | 1.87                        | 1.70-2.05 |
| 35-49                          | 2.19           | 1.99-2.41 | 2.17                        | 1.98-2.38 |

|                       |      |           |      |           |
|-----------------------|------|-----------|------|-----------|
| 50-64                 | 1.19 | 1.06-1.35 | 1.19 | 1.06-1.33 |
| Race                  |      |           |      |           |
| White                 | ---  | ---       | ---  | ---       |
| Black                 | .84  | .76-.92   | .82  | .75-.91   |
| Hispanic              | 1.02 | .91-1.14  | 1.01 | .91-1.12  |
| Other                 | .85  | .73-.98   | .83  | .72-.96   |
| Education             |      |           |      |           |
| Less than high school | ---  | ---       | ---  | ---       |
| High school graduate  | 1.64 | 1.49-1.81 | 1.66 | 1.51-1.83 |
| Some college          | 2.25 | 2.05-2.47 | 2.31 | 2.11-2.53 |
| College graduate      | 2.71 | 2.43-3.02 | 2.78 | 2.49-3.11 |
| Sex                   |      |           |      |           |
| Male                  | ---  | ---       | ---  | ---       |
| Female                | .60  | .56-.63   | .60  | .57-.64   |
| Ever Been Married     |      |           |      |           |
| No                    | ---  | ---       | ---  | ---       |
| Yes                   | 1.24 | 1.14-1.34 | 1.24 | 1.14-1.35 |
| General Health        |      |           |      |           |
| Excellent             | ---  | ---       | ---  | ---       |
| Very Good             | 1.05 | .97-1.14  | 1.05 | .97-1.14  |
| Good                  | .82  | .76-.89   | .82  | .75-.89   |

|                                          |      |           |      |           |
|------------------------------------------|------|-----------|------|-----------|
| Fair/Poor                                | .34  | .31-.38   | .34  | .30-.37   |
| N Children < 18 in Household             |      |           |      |           |
| 0                                        | ---  | ---       | ---  | ---       |
| 1                                        | 1.16 | 1.08-1.25 | 1.16 | 1.07-1.24 |
| 2                                        | 1.05 | .97-1.14  | 1.05 | .97-1.14  |
| 3+                                       | .70  | .63-.78   | .70  | .63-.78   |
| N Times Arrested and Booked in Past Year |      |           |      |           |
| None                                     | ---  | ---       | ---  | ---       |
| 1                                        | .64  | .55-.75   | .65  | .55-.76   |
| 2                                        | .49  | .35-.69   | .48  | .35-.68   |
| 3+                                       | .56  | .40-.80   | .54  | .37-.77   |
| County Type                              |      |           |      |           |
| Large Metro                              | ---  | ---       | ---  | ---       |
| Small Metro                              | .98  | .92-1.04  | .98  | .91-1.04  |
| Nonmetro                                 | .97  | .88-1.06  | .96  | .88-1.06  |
| Substance Use                            |      |           |      |           |
| No Substance Use Disorder                | ---  | ---       | ---  | ---       |
| Abuse Alcohol Only                       | 1.21 | 1.06-1.39 | 1.21 | 1.06-1.38 |
| Alcohol Dependent Only                   | 1.09 | .94-1.27  | 1.09 | .93-1.27  |
| Abuse Drugs Only                         | .88  | .68-1.14  | .87  | .68-1.12  |
| Drug Dependent Only                      | .78  | .63-.96   | .76  | .62-.93   |

|                                       |     |          |     |          |
|---------------------------------------|-----|----------|-----|----------|
| Abuse or Dependent<br>Alcohol & Drugs | .81 | .62-1.06 | .80 | .62-1.05 |
|---------------------------------------|-----|----------|-----|----------|

---

*Note:* In K6 models, mental illness severity corresponded to the 80<sup>th</sup>, 90<sup>th</sup>, 95<sup>th</sup> percentile cutoffs on the K6 in the sample: 0-6 = no mental illness, 7-9 = mild mental illness, 10-12 = moderate mental illness, and 13+ = serious mental illness. In the NSDUH classification models, mental illness severity corresponded to the NSDUH calibration model developed in 2008 (49, 51).

Appendix 2. Full- or part-time employment rates among adults 18-64 by education within mental health status groups

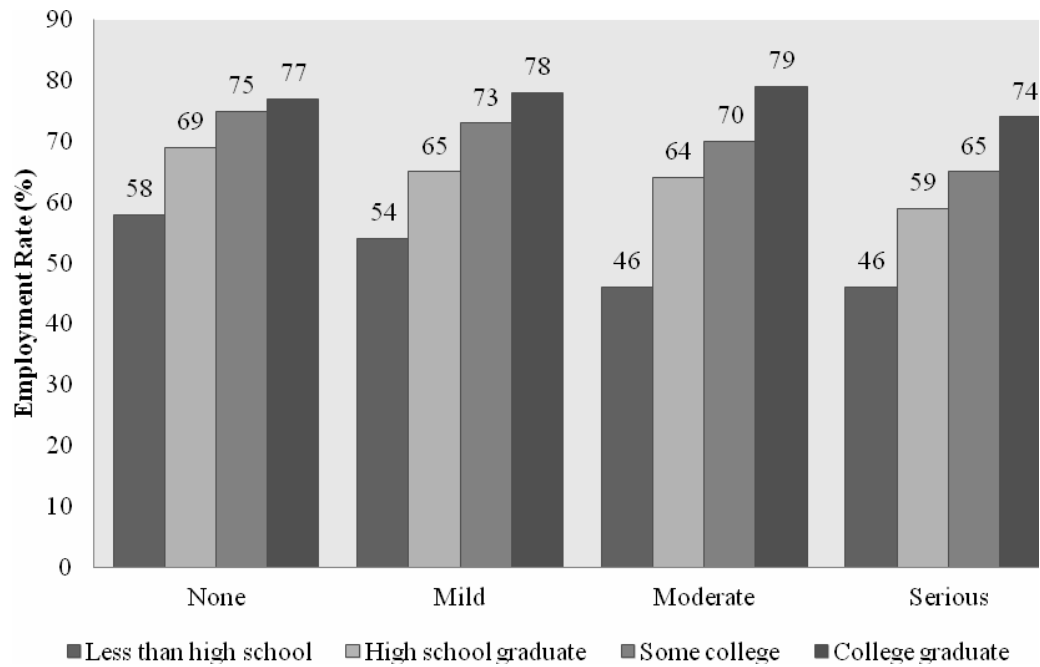

*Note:* Presents employment rates adjusted for age, gender, education, marital status, race/ethnicity, substance use disorders, self-reported general health, number of children in household, arrests in last year, and county type. The decrement to employment for workers without a high school degree compared to college graduates did not differ significantly with mental illness severity ( $p = .10$ ) based on an interaction term between mental illness severity and education in a logistic regression model predicting full- or part-time employment.
