# Supplementary material for: Employment Status of People With Mental Illness: National Survey Data From 2009 and 2010
Source: Atypon-hosted journal article supplement (doi:10.1176/appi.ps.201300335), 2014-06-16
Supplement: 1201_ds001.pdf [file 1201_ds001.pdf]

 


Psychiatry Online
